# Supplementary material
Source: PubMed Central journal article supplement (PMC10373024)
Supplement: jmcp.2022.28.9.970_S001.pdf [file jmcp.2022.28.9.970_S001.pdf]

## SUPPLEMENTARY MATERIALS

### The cost-effectiveness of brigatinib in adult patients with ALK inhibitor–naive *ALK*-positive non–small cell lung cancer from a US perspective

Holly Cranmer, MSc; Isabella Kearns, MSc; Melanie Young, PharmD, BCPS; Michael J Humphries, PhD; David Trueman, MSc

- Table 1: Health-related quality of life model
- Figure 1: Univariate sensitivity analysis tornado diagrams
- Figure 2: Scenario analyses – cost-effectiveness vs. crizotinib and cost-comparison vs. alectinib (basecase)
- Table 2: Scenario analyses – cost-effectiveness vs. crizotinib and cost-comparison vs. alectinib (basecase)
- Table 3: Scenario analyses – cost-effectiveness vs. alectinib
- Table 4: Health state costs (basecase)
- Table 5: Drug Costs (ALKis)
- Table 6: Unit costs for resource use
- Table 7: Adverse event costs
- Table 8: Subsequent therapy<sup>a</sup>
- Table 9: Disaggregated costs

**SUPPLEMENTARY TABLE 1 Health-related quality of life model**

| Category                    | Health State                      | Value/Option | Source                                                                                                                                                                             |
|-----------------------------|-----------------------------------|--------------|------------------------------------------------------------------------------------------------------------------------------------------------------------------------------------|
| Utility values <sup>a</sup> | Pre-progression                   | 0.806        | HRQoL analysis from ALTA-1L                                                                                                                                                        |
|                             | Progressed on treatment (general) | 0.688        | HRQoL analysis from ALTA-1L                                                                                                                                                        |
|                             | <b>CNS Progressed</b>             |              |                                                                                                                                                                                    |
|                             | Brigatinib                        | 0.553        | Calculation                                                                                                                                                                        |
|                             | Crizotinib                        | 0.553        | Calculation                                                                                                                                                                        |
|                             | Alectinib                         | 0.553        | Assumed equal to brigatinib in cost comparison basecase                                                                                                                            |
|                             | <b>Non-CNS Progressed</b>         |              |                                                                                                                                                                                    |
|                             | Brigatinib                        | 0.583        | Multiplier for impact of brain metastases compared with other metastatic sites based on data from Roughley et al. applied to progressed on treatment utility estimate <sup>b</sup> |
|                             | Crizotinib                        | 0.585        |                                                                                                                                                                                    |
|                             | Alectinib                         | 0.583        |                                                                                                                                                                                    |
| Utility multiplier          | Chemo multiplier                  | 90.24%       | Blackhall et al. (2014) <sup>c</sup>                                                                                                                                               |
|                             | BSC                               | 70.28%       | Nafees et al. (2008) <sup>d</sup>                                                                                                                                                  |
|                             | CNS multiplier                    | 75.36%       | Roughley et al. (2014) <sup>b</sup>                                                                                                                                                |
| Utility decrements          | ≥1 grade 3/4 AE                   | -0.024       | HRQoL analysis                                                                                                                                                                     |
|                             | Age                               | -0.0003      | Ara and Brazier (2011) <sup>e</sup>                                                                                                                                                |

<sup>a</sup>Differences in the utility values within CNS progressed and non CNS progressed are driven by subsequent therapy assumptions as different utilities applied based on receipt of BSC, chemotherapy, or ALKi.

<sup>b</sup>Roughley A, Damonte E, Taylor-Stokes G, Rider A, Munk VC. Impact of brain metastases on quality of life and estimated life expectancy in patients with advanced non-small cell lung cancer. *Value Health*. 2014;17(7):A650. doi: 10.1016/j.jval.2014.08.2364

<sup>c</sup>Blackhall F, Kim DW, Besse B, et al. Patient-reported outcomes and quality of life in PROFILE 1007: A randomized trial of crizotinib compared with chemotherapy in previously treated patients with ALK-positive advanced non-small-cell lung cancer. *J Thorac Oncol*. 2014;9(11):1625-33. doi: 10.1097/JTO.0000000000000318

<sup>d</sup>Nafees B, Stafford M, Gavriel S, Bhalla S, Watkins J. Health state utilities for non small cell lung cancer. *Health Qual Life Outcomes*. 2008;6:84. doi: 10.1186/1477-7525-6-84

°Ara R, Brazier JE. Using health state utility values from the general population to approximate baselines in decision analytic models when condition-specific data are not available. *Value Health*. 2011;14(4):539-45. doi: 10.1016/j.jval.2010.10.029

AE, adverse event; ALK, anaplastic lymphoma kinase tyrosine kinase inhibitors; BSC, best supportive care; CNS, central nervous system.

**SUPPLEMENTARY FIGURE 1 Univariate sensitivity analysis tornado diagrams**

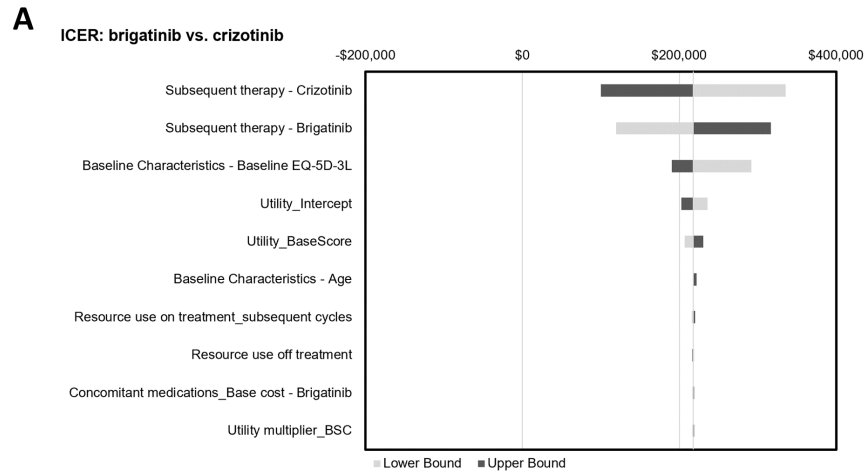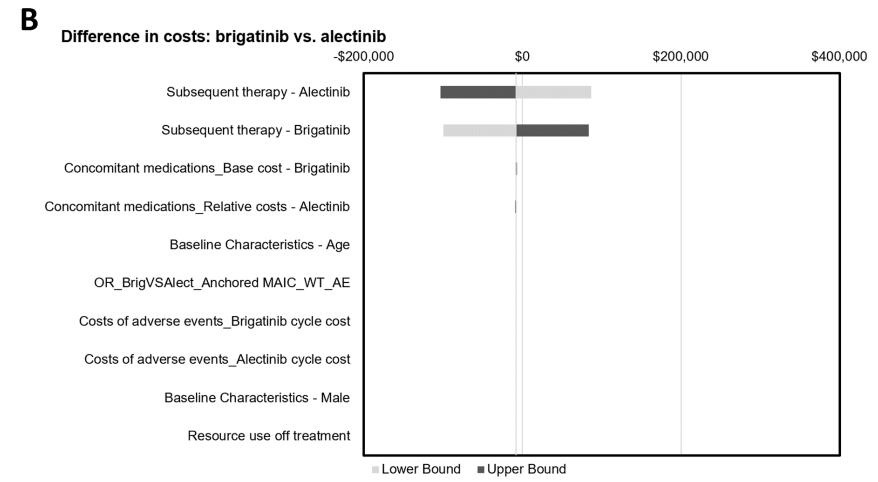

A. Brigatinib vs. crizotinib; B. Brigatinib vs. alectinib.

BIRC, blinded independent review committee; Brig, brigatinib; CNS, central nervous system; HR, hazard ratio; ICER, Incremental cost-effectiveness ratio; MAIC, match-adjusted indirect comparison; OS, overall survival; PD, progressive disease; PFS, progression-free survival; WT, weight.

**SUPPLEMENTARY FIGURE 2 Cost-effectiveness acceptability curve**

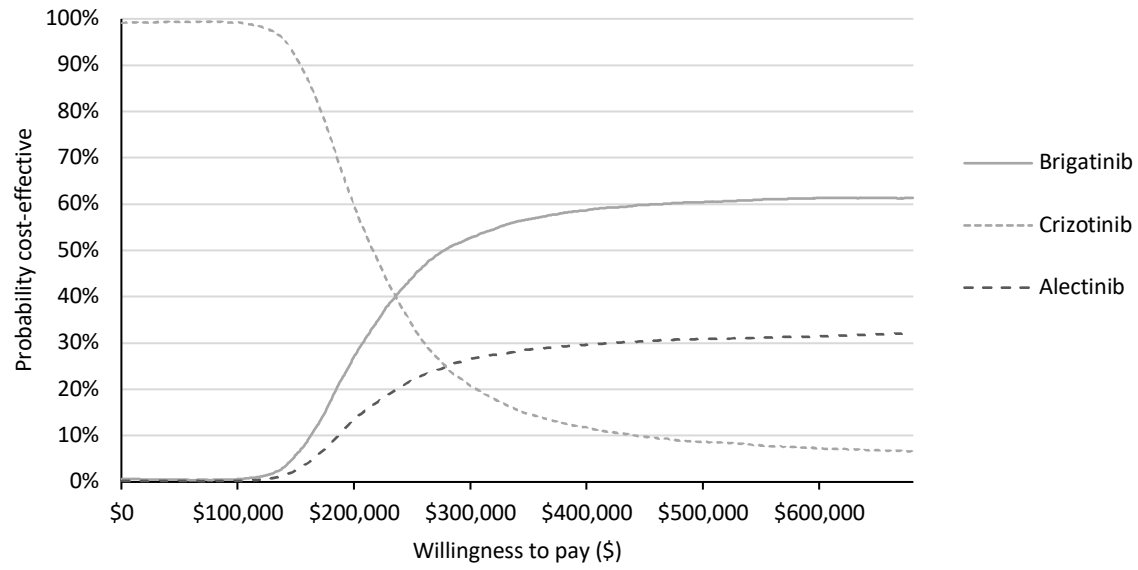

**SUPPLEMENTARY TABLE 2 Scenario analyses – cost-effectiveness vs. crizotinib and cost-comparison vs. alectinib (basecase)**

| <b>Scenario</b>                    | <b>Brigatinib vs. crizotinib,<br/>ICER</b> | <b>Brigatinib vs. alectinib,<br/>cost difference<sup>a</sup></b> |
|------------------------------------|--------------------------------------------|------------------------------------------------------------------|
| Clinical effectiveness scenarios   |                                            |                                                                  |
| Population                         |                                            |                                                                  |
| ITT                                | \$217,607                                  | -\$8,546                                                         |
| Parametric model fits for OS       |                                            |                                                                  |
| Weibull                            | \$192,111                                  | -\$7,817                                                         |
| Gompertz                           | \$169,483                                  | -\$7,137                                                         |
| Log-logistic                       | \$207,637                                  | -\$7,416                                                         |
| Log-normal                         | \$210,504                                  | -\$7,303                                                         |
| Gamma                              | \$197,143                                  | -\$8,001                                                         |
| Gen. Gamma                         | \$171,073                                  | -\$7,330                                                         |
| Exponential                        | \$217,607                                  | -\$8,546                                                         |
| Parametric model fits for PFS BIRC |                                            |                                                                  |
| Weibull                            | \$240,464                                  | -\$8,200                                                         |
| Gompertz                           | \$254,150                                  | -\$7,533                                                         |
| Log-logistic                       | \$258,734                                  | -\$7,763                                                         |
| Log-normal                         | \$259,625                                  | -\$7,664                                                         |
| Gamma                              | \$233,017                                  | -\$8,309                                                         |
| Gen. Gamma                         | \$255,068                                  | -\$7,700                                                         |
| Exponential                        | \$217,607                                  | -\$8,546                                                         |
| Parametric model fits for CNS-PFS  |                                            |                                                                  |
| Weibull                            | \$217,608                                  | –                                                                |

| Scenario                                                   | Brigatinib vs. crizotinib,<br>ICER | Brigatinib vs. alectinib,<br>cost difference <sup>a</sup> |
|------------------------------------------------------------|------------------------------------|-----------------------------------------------------------|
| Gompertz                                                   | \$225,994                          | –                                                         |
| Log-logistic                                               | \$219,296                          | –                                                         |
| Log-normal                                                 | \$220,007                          | –                                                         |
| Gamma                                                      | \$217,186                          | –                                                         |
| Gen. Gamma                                                 | \$225,623                          | –                                                         |
| Exponential                                                | \$217,607                          | –                                                         |
| Treatment switching adjustments                            |                                    |                                                           |
| No switching adjustment                                    | \$217,607                          | –                                                         |
| Adjusted for official switchers using RPSFTM, no censoring | \$241,890                          | –                                                         |
| Adjusted for official switchers using RPSFTM, re-censoring | \$215,143                          | –                                                         |
| Adjusted for all switchers using RPSFTM, no re-censoring   | \$246,051                          | –                                                         |
| Adjusted for all switchers using RPSFTM, re-censoring      | \$221,334                          | –                                                         |
| Utility source                                             |                                    |                                                           |
| Utility sourced from Chouaid et al.                        | \$249,671                          | –                                                         |
| Utility sourced from ALTA-1L                               | \$217,607                          | –                                                         |
| Cost scenarios                                             |                                    |                                                           |
| Time on treatment                                          |                                    |                                                           |
| Weibull                                                    | \$96,704                           | -\$9,858                                                  |
| Gompertz                                                   | \$111,088                          | -\$9,666                                                  |
| Log-logistic                                               | \$243,587                          | -\$9,006                                                  |
| Log-normal                                                 | \$195,553                          | -\$9,320                                                  |

| Scenario                                              | Brigatinib vs. crizotinib,<br>ICER | Brigatinib vs. alectinib,<br>cost difference <sup>a</sup> |
|-------------------------------------------------------|------------------------------------|-----------------------------------------------------------|
| Gamma                                                 | \$97,468                           | -\$9,855                                                  |
| Gen. Gamma                                            | \$40,654                           | -\$10,203                                                 |
| Exponential                                           | \$98,436                           | -\$9,851                                                  |
| Treat until progression                               | \$217,607                          | -\$8,546                                                  |
| Treat one cycle post-progression                      | \$215,409                          | -\$8,477                                                  |
| Treat two cycles post-progression                     | \$213,210                          | -\$8,407                                                  |
| Treat three cycles post-progression                   | \$211,011                          | -\$8,338                                                  |
| Relative dose intensity                               |                                    |                                                           |
| Apply relative dose intensity                         | \$217,607                          | -\$8,546                                                  |
| Exclude relative dose intensity calculations          | \$248,263                          | \$21,743                                                  |
| Source of subsequent therapy                          |                                    |                                                           |
| Source from ALTA-1L and relevant clinical trials      | \$165,990                          | \$72,740                                                  |
| Ceritinib dose (subsequent therapy)                   |                                    |                                                           |
| 750 mg                                                | \$215,138                          | -                                                         |
| Discount rate scenarios                               |                                    |                                                           |
| No discount rate applied to costs and health outcomes | \$214,518                          | -\$12,461                                                 |
| Discount rate of 3% for both cost and health outcomes | \$217,607                          | -\$8,546                                                  |



| Scenario               | Brigatinib vs. crizotinib,<br>ICER | Brigatinib vs. alectinib,<br>cost difference <sup>a</sup> |
|------------------------|------------------------------------|-----------------------------------------------------------|
| Time horizon scenarios |                                    |                                                           |
| 5-years                | \$221,489                          | -\$12,227                                                 |
| 10-years               | \$242,895                          | -\$10,546                                                 |
| 30-years               | \$217,607                          | -\$8,546                                                  |

<sup>a</sup>Cost-saving unless otherwise stated.

BIRC, blinded independent review committee; ICER, incremental cost-effectiveness ratio; ITT, intention-to-treat; OS; overall survival; PFS, progression-free survival; RPSFTM, rank preserving structural failure time models.

#### SUPPLEMENTARY TABLE 3 Scenario analyses – cost-effectiveness vs. alectinib

| Scenario                                                                                               | Brigatinib vs. alectinib,<br>ICER |
|--------------------------------------------------------------------------------------------------------|-----------------------------------|
| Cost-effectiveness brigatinib vs. alectinib                                                            |                                   |
| Unadjusted Bucher (ITT, OS and PFS BIRC), no adjustment for switching                                  | \$159,858                         |
| Unadjusted Bucher (ITT, OS and PFS BIRC), treatment switching all switchers, no re-censoring           | \$198,793                         |
| Unadjusted Bucher (ITT, OS and PFS BIRC), treatment switching all switchers, re-censoring              | \$293,116                         |
| Unadjusted Bucher (ITT, OS and PFS BIRC), treatment switching official switchers only, no re-censoring | \$194,683                         |
| Unadjusted Bucher (ITT, OS and PFS BIRC), treatment switching official switchers only, re-censoring    | \$261,223                         |
| Anchored MAIC (ITT, OS and PFS BIRC), no adjustment for switching                                      | \$142,336                         |
| Anchored MAIC (ITT, OS and PFS BIRC), treatment switching all switchers, no re-censoring               | \$92,898                          |
| Anchored MAIC (ITT, OS and PFS BIRC), treatment switching all switchers, re-censoring                  | \$122,218                         |
| Anchored MAIC (ITT, OS and PFS BIRC), treatment switching official switchers only, no re-censoring     | \$86,902                          |
| Anchored MAIC (ITT, OS and PFS BIRC), treatment switching official switchers only, re-censoring        | \$124,733                         |
| Unanchored MAIC (ITT, OS and PFS BIRC)                                                                 | \$149,298                         |

| Scenario                                                                                              | Brigatinib vs. alectinib,<br>ICER |
|-------------------------------------------------------------------------------------------------------|-----------------------------------|
| Unadjusted Bucher (ITT, OS and PFS INV), no adjustment for switching                                  | \$163,948                         |
| Unadjusted Bucher (ITT, OS and PFS INV), treatment switching all switchers, no re-censoring           | \$207,133                         |
| Unadjusted Bucher (ITT, OS and PFS INV), treatment switching all switchers, re-censoring              | \$304,461                         |
| Unadjusted Bucher (ITT, OS and PFS INV), treatment switching official switchers only, no re-censoring | \$202,660                         |
| Unadjusted Bucher (ITT, OS and PFS INV), treatment switching official switchers only, re-censoring    | \$272,659                         |
| Anchored MAIC (ITT, OS and PFS INV), no adjustment for switching                                      | \$150,918                         |
| Anchored MAIC (ITT, OS and PFS INV), treatment switching all switchers, no re-censoring               | \$38,174                          |
| Anchored MAIC (ITT, OS and PFS INV), treatment switching all switchers, re-censoring                  | \$109,127                         |
| Anchored MAIC (ITT, OS and PFS INV), treatment switching official switchers only, no re-censoring     | \$21,524                          |
| Anchored MAIC (ITT, OS and PFS INV), treatment switching official switchers only, re-censoring        | \$114,429                         |
| Unanchored MAIC (ITT, OS and PFS INV)                                                                 | \$91,002                          |

BIRC, blinded independent review committee; ICER, incremental cost-effectiveness ratio; INV, investigator; ITT, intention-to-treat; MAIC, matched adjusted indirect comparisons; OS, overall survival; PFS, progression-free survival.

**SUPPLEMENTARY TABLE 4 Health state costs (basecase)**

|            | Pre-Progression | Progressed disease | End of life |
|------------|-----------------|--------------------|-------------|
| Discounted |                 |                    |             |
| Brigatinib | \$614,014       | \$328,859          | \$1,415     |
| Crizotinib | \$347,810       | \$392,699          | \$1,488     |
| Alectinib  | \$610,143       | \$340,785          | \$1,415     |

**SUPPLEMENTARY TABLE 5 Drug Costs (ALKis)**

|                        | <b>Brigatinib<sup>a</sup></b>                                                                         | <b>Brigatinib</b>                                                 | <b>Alectinib</b>                                               | <b>Crizotinib</b>                                                 |
|------------------------|-------------------------------------------------------------------------------------------------------|-------------------------------------------------------------------|----------------------------------------------------------------|-------------------------------------------------------------------|
| Dose                   | 90 mg OD                                                                                              | 180 mg OD                                                         | 600 mg BD                                                      | 250 mg BD                                                         |
| Mode                   | Oral                                                                                                  | Oral                                                              | Oral                                                           | Oral                                                              |
| Pack size (#tablets)   | 7                                                                                                     | 30                                                                | 240                                                            | 60                                                                |
| mg/capsule             | 90                                                                                                    | 180                                                               | 150                                                            | 250                                                               |
| Live price/pack(cycle) | \$3,819.00                                                                                            | \$16,364.00                                                       | \$15,395.60                                                    | \$17,701.53                                                       |
| Source                 | Micromedex REDBOOK. WAC for 7 day therapy initiation course. Accessed 11/13/2020, dose as per ALTA 1L | Micromedex REDBOOK. WAC. Accessed 11/13/2020, dose as per ALTA 1L | Micromedex REDBOOK. WAC. Accessed 11/13/2020; dose as per ALEX | Micromedex REDBOOK. WAC. Accessed 11/13/2020; dose as per ALTA 1L |

<sup>a</sup>Brigatinib 7 day lead in.

ALK, anaplastic lymphoma kinase tyrosine kinase inhibitors; OD, once-daily; BD, twice-daily.

**SUPPLEMENTARY TABLE 6 Unit costs for resource use**

| Items                     | Unit cost (£) | Source                                                                                                                                                          |
|---------------------------|---------------|-----------------------------------------------------------------------------------------------------------------------------------------------------------------|
| Oncology outpatient (f)   | \$25.63       | CMS Physician Lookup<br>CPT 99211 - office/outpatient visit                                                                                                     |
| Oncology outpatient (s)   | \$92.47       | CPT 99213                                                                                                                                                       |
| GP visit                  | \$92.47       | Assumed equal to oncology outpatient                                                                                                                            |
| Cancer nurse              | \$92.47       | Assumed equal to oncology outpatient                                                                                                                            |
| Biochemistry              | \$10.56       | CMS Physician Lookup CPT 80053 - comprehensive metabolic panel                                                                                                  |
| Full blood test           | \$7.77        | CMS Physician Lookup CPT 85025 - complete blood count                                                                                                           |
| CT scan                   | \$180.97      | CMS Physician Lookup CPT 70460 - computed tomography, head/brain                                                                                                |
| X-ray                     | \$34.2        | CMS; CPT 71046                                                                                                                                                  |
| MRI                       | \$226.64      | CMS Physician Lookup CPT 70551 - MRI                                                                                                                            |
| ECG                       | \$80.6        | CMS; CPT 93224                                                                                                                                                  |
| Steroids (dexamethasone)  | \$55.51       |                                                                                                                                                                 |
| Stereotactic radiotherapy | \$1,076.66    | CMS; CPT 77372; note that these procedural costs (SRS, WBRT, resection) may not fully capture costs as there may be management-associated costs after treatment |
| Whole brain radiotherapy  | \$428.84      | CMS; CPT 77432                                                                                                                                                  |
| Surgical resection        | \$1,510.17    | CMS; CPT 32480 (partial removal of lung)                                                                                                                        |

CT, computed tomography; GP, general practitioner; ECG, electrocardiogram; MRI, magnetic resonance imaging.

**SUPPLEMENTARY TABLE 7 Adverse event costs**

| Adverse event                            | Unit cost |
|------------------------------------------|-----------|
| Blood creatinine phosphokinase increased | \$200.48  |
| Amylase increased                        | \$200.48  |
| Nausea                                   | \$7,042   |
| Hypertension                             | \$7,013   |
| Increased AST                            | \$200.48  |
| Increased ALT                            | \$200.48  |
| Increased lipase level†                  | \$200.48  |
| Neutropenia                              | \$1,3378  |
| Anaemia                                  | \$8,013   |
| Diarrhoea                                | \$7,042   |
| Vomiting                                 | \$7,042   |
| Gamma-glutamyl transferase increased     | \$200.48  |
| Myalgia                                  | \$0       |
| Fatigue                                  | \$0       |
| Pneumonia                                | \$10,756  |
| Acute kidney injury                      | \$5,604   |

| Adverse event                        | Unit cost |
|--------------------------------------|-----------|
| Weight decreased                     | \$0       |
| Dizziness                            | \$0       |
| Dysgeusia                            | \$0       |
| Asthenia                             | \$8,811   |
| Neoplasm Progression                 | \$12,805  |
| Dyspnoea                             | \$0       |
| Pulmonary embolism                   | \$9,517   |
| Blood Alkaline Phosphatase Increased | \$200.48  |
| Hypercholesterolemia                 | \$200.48  |
| Hypertriglyceridemia                 | \$200.48  |
| Edema                                | \$10,655  |
| Weight increased                     | \$0       |
| Peripheral Neuropathy                | \$9,222   |
| Cognitive defects                    | \$7,203   |
| Mood effects                         | \$0       |
| Hyperlipidemia                       | \$200.48  |

ALT, alanine aminotransferase; AST, aspartate transaminase.

**SUPPLEMENTARY TABLE 8 Subsequent therapy<sup>a</sup>**

| <b>Subsequent therapy distributions, %</b> | <b>Brigatinib</b> | <b>Crizotinib</b> | <b>Alectinib</b> |
|--------------------------------------------|-------------------|-------------------|------------------|
| Brigatinib                                 | 0.00              | 30.00             | 30.00            |
| Crizotinib                                 | 0.00              | 0.00              | 0.00             |
| Alectinib                                  | 30.00             | 20.00             | 0.00             |
| Ceritinib                                  | 5.00              | 10.00             | 5.00             |
| Lorlatinib                                 | 50.00             | 20.00             | 50.00            |
| Immunotherapy                              | 5.00              | 5.00              | 5.00             |
| VEGF-R                                     | 0.00              | 0.00              | 0.00             |
| Chemotherapy                               | 10.00             | 15.00             | 10.00            |
| Best supportive care                       | 100.00            | 100.00            | 100.00           |

<sup>a</sup>It is assumed that all patients will receive best supportive care following active subsequent therapies.

VEGF-R, vascular endothelial growth factor receptor.

**SUPPLEMENTARY TABLE 9 Disaggregated costs**

| <b>Intervention</b> | <b>Treatment</b> | <b>Concomitant medications</b> | <b>Resource use on treatment</b> | <b>Resource use off treatment</b> | <b>Subsequent therapy</b> | <b>Terminal care</b> | <b>Adverse events</b> | <b>Total</b> |
|---------------------|------------------|--------------------------------|----------------------------------|-----------------------------------|---------------------------|----------------------|-----------------------|--------------|
| Brigatinib          | \$606,333        | \$3,909                        | \$12,919                         | \$23,797                          | \$319,187                 | \$1,460              | \$179                 | \$968,833    |
| Crizotinib          | \$341,964        | \$2,066                        | \$6,299                          | \$27,675                          | \$376,703                 | \$1,529              | \$51                  | \$758,314    |
| Alectinib           | \$602,504        | \$3,909                        | \$12,919                         | \$23,797                          | \$331,664                 | \$1,460              | \$78                  | \$977,379    |
| Ceritinib           | \$254,041        | \$2,949                        | \$9,679                          | \$17,451                          | \$276,126                 | \$1,577              | \$202                 | \$562,931    |
| Lorlatinib          | \$1,027,436      | \$6,765                        | \$22,555                         | \$8,309                           | \$175,290                 | \$1,464              | \$367                 | \$1,242,185  |
